# Supplementary material for: Mucosal Antibody Response to SARS-CoV-2 in Paediatric and Adult Patients: A Longitudinal Study
Source: MDPI journal article supplement (doi:10.3390/pathogens11040397), 2022-03-24
Supplement: s1 [file s1]

## Supplementary Material

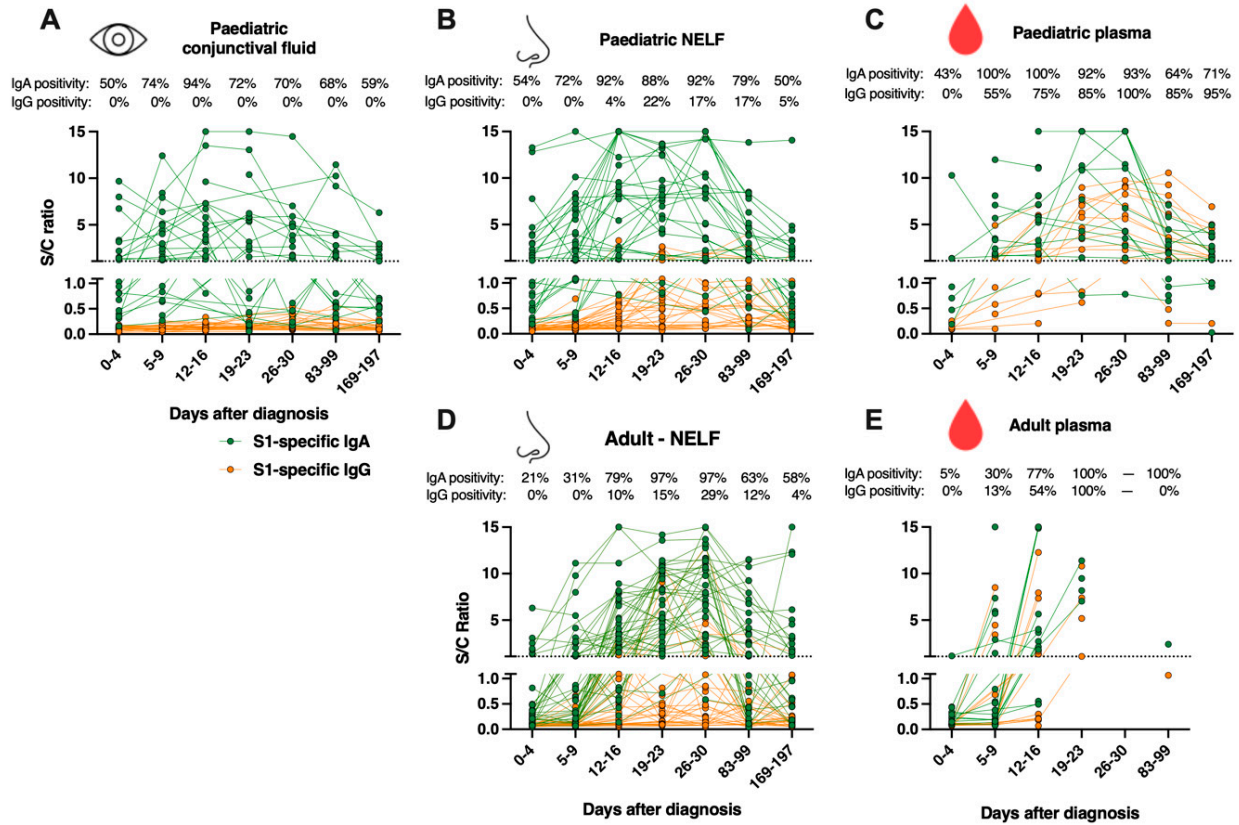

Supplementary Figure S1. SARS-CoV-2 S1-specific antibody levels in COVID-19 patients.

The longitudinal changes of S1-specific IgA (green dot) and IgG (orange dot) in the (A) conjunctival fluid, (B) nasal epithelial lining fluid (NELF) and (C) plasma of paediatric patients and the (D) NELF and (E) plasma of adult patients were plotted. Data points above the dotted line (Sample/Calibrator (S/C) ratio  $\geq 1.1$ ) are considered positive, while  $y=15$  indicates the upper detection limit of the assay. The percentages denote the IgA and IgG positivity at each time point.

#### A. Conjunctival Fluid (CF) - IgA

| Days post diagnosis                |                | 0-4     | 5-9     | 12-16         | 19-23   | 26-30         | 83-99   | 169-197       |
|------------------------------------|----------------|---------|---------|---------------|---------|---------------|---------|---------------|
| All Paediatric patients            | No. of sample  | 20      | 22      | 17            | 18      | 20            | 19      | 17            |
|                                    | %              | 50      | 74      | 94            | 72      | 70            | 68      | 59            |
| Asymptomatic                       | n              | 9       | 9       | 5             | 5       | 8             | 8       | 7             |
|                                    | Median ± IQR   | 0.9±6.8 | 2.1±3.2 | 2.3±2.4       | 0.7±4.0 | 1.0±1.9       | 1.1±2.3 | 0.6±1.4       |
| Symptomatic                        | %              | 44      | 67      | 80            | 40      | 50            | 50      | 43            |
|                                    | n              | 11      | 13      | 12            | 13      | 12            | 11      | 10            |
| Symptomatic                        | Median ± IQR   | 1.3±1.8 | 1.9±7.1 | 5.4±6.3       | 5.6±7.0 | 5.0±4.6       | 2.8±5.5 | 2.1±3.1       |
|                                    | %              | 55      | 77      | 100           | 85      | 83            | 82      | 70            |
| Mann-Whitney test between groups   | <i>p</i> value | 0.8820  | 0.5556  | <b>0.0365</b> | 0.1433  | <b>0.0252</b> | 0.1087  | <b>0.0431</b> |
| Fisher's Exact test between groups | <i>p</i> value | ns      | 0.6550  | 0.2941        | 0.0987  | 0.1611        | 0.3189  | 0.3500        |

#### B. Nasal epithelial lining fluid (NELF) - IgA

| Days post diagnosis                |                | 0-4           | 5-9     | 12-16    | 19-23   | 26-30    | 83-99   | 169-197 |
|------------------------------------|----------------|---------------|---------|----------|---------|----------|---------|---------|
| Paediatric patients                | No. of sample  | 28            | 29      | 25       | 25      | 24       | 24      | 22      |
|                                    | %              | 54            | 72      | 92       | 88      | 92       | 79      | 50      |
| Asymptomatic                       | n              | 11            | 10      | 6        | 7       | 7        | 8       | 7       |
|                                    | Median ± IQR   | 2.9±6.3       | 5.8±6.1 | 9.3±13.0 | 8.7±8.7 | 7.1±9.3  | 2.2±4.9 | 0.7±2.1 |
| Symptomatic                        | %              | 82            | 90      | 83       | 86      | 86       | 63      | 43      |
|                                    | n              | 17            | 19      | 19       | 18      | 17       | 16      | 15      |
| Symptomatic                        | Median ± IQR   | 0.7±1.3       | 1.5±3.1 | 8.2±12.7 | 7.7±8.8 | 8.3±10.7 | 3.1±5.6 | 1.8±2.4 |
|                                    | %              | 35            | 63      | 95       | 89      | 94       | 88      | 53      |
| Mann-Whitney test between groups   | <i>p</i> value | <b>0.0017</b> | 0.0854  | 0.7778   | 0.9400  | 0.4641   | 0.4167  | 0.1417  |
| Fisher's Exact test between groups | <i>p</i> value | <b>0.0238</b> | 0.2008  | 0.4300   | ns      | 0.5072   | 0.2885  | ns      |

#### D. Plasma - IgA

| Days post diagnosis                |                | 0-4     | 5-9     | 12-16    | 19-23     | 26-30     | 83-99   | 169-197       |
|------------------------------------|----------------|---------|---------|----------|-----------|-----------|---------|---------------|
| Paediatric patients                | No. of sample  | 7       | 11      | 12       | 13        | 13        | 14      | 14            |
|                                    | %              | 43      | 100     | 100      | 92        | 92        | 64      | 71            |
| Asymptomatic                       | n              | 1       | 7       | 3        | 1         | 2         | 4       | 4             |
|                                    | Median ± IQR   | 0.200   | 6.8±6.2 | 11.0±5.4 | 6.800     | 2.8±2.9   | 0.8±1.0 | 1.0±2.8       |
| Symptomatic                        | %              | 0       | 100     | 100      | 100       | 100       | 25      | 25            |
|                                    | n              | 6       | 4       | 9        | 12        | 11        | 10      | 10            |
| Symptomatic                        | Median ± IQR   | 1.1±1.4 | 2.9±3.6 | 5.2±5.3  | 10.9±11.2 | 11.0±11.5 | 2.5±3.7 | 1.9±2.8       |
|                                    | %              | 50      | 100     | 100      | 92        | 91        | 80      | 90            |
| Mann-Whitney test between groups   | <i>p</i> value | -       | 0.2303  | 0.1455   | -         | 0.2821    | 0.0759  | 0.1419        |
| Fisher's Exact test between groups | <i>p</i> value | -       | ns      | ns       | -         | ns        | 0.0949  | <b>0.0410</b> |

#### C. NELF - IgG

| Days post diagnosis                |                | 0-4     | 5-9           | 12-16   | 19-23   | 26-30         | 83-99   | 169-197       |
|------------------------------------|----------------|---------|---------------|---------|---------|---------------|---------|---------------|
| Paediatric patients                | No. of sample  | 26      | 26            | 24      | 23      | 24            | 24      | 22            |
|                                    | %              | 0       | 0             | 4       | 22      | 17            | 17      | 5             |
| Asymptomatic                       | n              | 10      | 8             | 6       | 5       | 7             | 8       | 7             |
|                                    | Median ± IQR   | 0.1±0.1 | 0.2±0.1       | 0.5±0.9 | 0.6±0.3 | 0.2±0.4       | 0.4±0.5 | 0.1±0.1       |
| Symptomatic                        | %              | 0       | 0             | 17      | 0       | 0             | 13      | 0             |
|                                    | n              | 16      | 18            | 18      | 18      | 17            | 16      | 15            |
| Symptomatic                        | Median ± IQR   | 0.1±0.0 | 0.1±0.1       | 0.2±0.2 | 0.5±1.2 | 0.6±1.0       | 0.4±0.8 | 0.2±0.3       |
|                                    | %              | 0       | 0             | 0       | 28      | 24            | 19      | 7             |
| Mann-Whitney test between groups   | <i>p</i> value | 0.1956  | <b>0.0293</b> | 0.1008  | 0.8006  | <b>0.0389</b> | 0.4614  | <b>0.0319</b> |
| Fisher's Exact test between groups | <i>p</i> value | ns      | ns            | 0.2500  | 0.5453  | 0.2833        | ns      | ns            |

#### E. Plasma - IgG

| Days post diagnosis                |                | 0-4     | 5-9     | 12-16         | 19-23   | 26-30   | 83-99   | 169-197 |
|------------------------------------|----------------|---------|---------|---------------|---------|---------|---------|---------|
| Paediatric patients                | No. of sample  | 7       | 11      | 12            | 13      | 13      | 13      | 14      |
|                                    | %              | 0       | 55      | 75            | 85      | 100     | 85      | 86      |
| Asymptomatic                       | n              | 1       | 7       | 3             | 1       | 2       | 3       | 4       |
|                                    | Median ± IQR   | 0.100   | 1.7±4.5 | 7.1±5.7       | 2.800   | 2.2±1.4 | 2.0±4.9 | 1.8±1.0 |
| Symptomatic                        | %              | 0       | 57      | 100           | 100     | 100     | 100     | 75      |
|                                    | n              | 6       | 4       | 9             | 12      | 11      | 10      | 10      |
| Symptomatic                        | Median ± IQR   | 0.1±0.1 | 1.0±1.1 | 1.3±3.0       | 5.2±4.7 | 7.0±4.8 | 4.8±6.6 | 2.3±3.2 |
|                                    | %              | 0       | 50      | 67            | 83      | 100     | 80      | 90      |
| Mann-Whitney test between groups   | <i>p</i> value | -       | 0.4121  | <b>0.0364</b> | -       | 0.1538  | 0.4685  | 0.3037  |
| Fisher's Exact test between groups | <i>p</i> value | -       | ns      | 0.5091        | -       | ns      | ns      | 0.5055  |

**Table S1. Comparisons of the SARS-CoV-2 S1-specific antibody levels between asymptomatic vs symptomatic paediatric patients with mild disease.**

The antibody levels in S/C ratios at the same time point were compared by the Mann-Whitney test, while the percentages of positive samples were compared by Fisher's Exact test. *P* values smaller than 0.05 are bolded, *p* values >0.9999 are represented by ns (not significant) while dashes mean no data for comparison.

### A. Nasal epithelial lining fluid (NELF)

| Days post diagnosis                                     | IgA           | 0-4     | 5-9     | 12-16   | 19-23   | 26-30   | 83-99    | 169-197  | Days post diagnosis                                     | IgG           | 0-4           | 5-9      | 12-16         | 19-23   | 26-30   | 83-99   | 169-197 |
|---------------------------------------------------------|---------------|---------|---------|---------|---------|---------|----------|----------|---------------------------------------------------------|---------------|---------------|----------|---------------|---------|---------|---------|---------|
| Adult patients                                          | No. of sample | 32      | 42      | 43      | 35      | 35      | 30       | 23       | Adult patients                                          | No. of sample | 26            | 30       | 29            | 27      | 28      | 26      | 23      |
|                                                         | n             | 13      | 17      | 18      | 15      | 14      | 10       | 8        |                                                         | n             | 10            | 10       | 10            | 10      | 9       | 8       | 7       |
| Mild disease                                            | Median ± IQR  | 0.3±1.7 | 1.1±4.0 | 3.4±5.5 | 4.7±6.7 | 5.9±8.5 | 1.1±4.2  | 1.7±3.9  | Mild disease                                            | Median ± IQR  | 0.1±0.1       | 0.1±0.1  | 0.1±1.0       | 0.2±0.2 | 0.6±0.8 | 0.1±0.3 | 0.1±0.1 |
|                                                         | %             | 31      | 47      | 89      | 93      | 93      | 50       | 63       |                                                         | %             | 0             | 0        | 20            | 0       | 11      | 0       | 0       |
|                                                         | n             | 13      | 17      | 17      | 13      | 12      | 11       | 8        |                                                         | n             | 10            | 12       | 11            | 10      | 10      | 9       | 9       |
| Moderate disease                                        | Median ± IQR  | 0.3±0.4 | 0.6±0.9 | 2.8±5.4 | 7.2±7.1 | 9.3±6.1 | 4.9±10.4 | 2.8±11.2 | Moderate disease                                        | Median ± IQR  | 0.1±0.0       | 0.1±0.1  | 0.1±0.2       | 0.2±1.0 | 0.4±2.5 | 0.2±0.4 | 0.1±0.2 |
|                                                         | %             | 14      | 28      | 67      | 100     | 100     | 73       | 67       |                                                         | %             | 0             | 0        | 0             | 22      | 40      | 13      | 0       |
|                                                         | n             | 6       | 8       | 8       | 7       | 9       | 9        | 7        |                                                         | n             | 6             | 8        | 8             | 7       | 9       | 9       | 7       |
| Severe & critically ill                                 | Median ± IQR  | 0.2±0.6 | 0.2±1.0 | 3.5±6.5 | 8.4±5.1 | 9.8±5.7 | 2.6±5.5  | 9.5±2.4  | Severe & critically ill                                 | Median ± IQR  | 0.1±0.1       | 0.1±0.02 | 0.3±0.8       | 0.5±2.8 | 0.5±3.1 | 0.7±0.9 | 0.2±0.9 |
|                                                         | %             | 17      | 25      | 75      | 100     | 100     | 67       | 43       |                                                         | %             | 0             | 0        | 13            | 29      | 33      | 22      | 14      |
| Dunn's multiple comparisons test                        | p-values      |         |         |         |         |         |          |          | Dunn's multiple comparisons test                        | p-values      |               |          |               |         |         |         |         |
| Adult patients: mild disease vs moderate disease        | 0.9469        | 0.4095  | 0.7753  | 0.1974  | 0.6076  | 0.3648  | ns       |          | Adult patients: mild disease vs moderate disease        | ns            | ns            | ns       | 0.931         | ns      | ns      | ns      |         |
| Adult patients: mild disease vs severe & critically ill | 0.3959        | 0.1715  | ns      | 0.3957  | 0.8992  | ns      | ns       |          | Adult patients: mild disease vs severe & critically ill | 0.0751        | <b>0.0249</b> | ns       | <b>0.0221</b> | ns      | ns      | 0.1921  |         |
| Adult patients: mild disease vs severe & critically ill | ns            | ns      | ns      | ns      | ns      | ns      | ns       |          | Adult patients: mild disease vs severe & critically ill | 0.3243        | <b>0.0461</b> | ns       | 0.2357        | ns      | ns      | 0.2809  |         |
| Fisher's Exact test between groups                      | p-values      |         |         |         |         |         |          |          | Fisher's Exact test between groups                      | p-values      |               |          |               |         |         |         |         |
| Adult patients: mild disease vs moderate disease        | 0.6447        | 0.2818  | 0.2285  | ns      | ns      | 0.3870  | ns       |          | Adult patients: mild disease vs moderate disease        | ns            | ns            | 0.2143   | 0.4737        | 0.3034  | ns      | ns      |         |
| Adult patients: mild disease vs severe & critically ill | ns            | 0.4018  | 0.5633  | ns      | ns      | 0.6499  | 0.6193   |          | Adult patients: mild disease vs severe & critically ill | ns            | ns            | ns       | 0.1544        | 0.5765  | 0.4706  | ns      |         |
| Adult patients: mild disease vs severe & critically ill | ns            | ns      | ns      | ns      | ns      | ns      | 0.6193   |          | Adult patients: mild disease vs severe & critically ill | ns            | ns            | 0.4211   | ns            | ns      | ns      | 0.4375  |         |

### B. Plasma

| Days post diagnosis                                     | IgA           | 0-4           | 5-9     | 12-16     | 19-23   | 26-30 | 83-99 | 169-197 | Days post diagnosis                                     | IgG           | 0-4     | 5-9     | 12-16   | 19-23   | 26-30 | 83-99 | 169-197 |
|---------------------------------------------------------|---------------|---------------|---------|-----------|---------|-------|-------|---------|---------------------------------------------------------|---------------|---------|---------|---------|---------|-------|-------|---------|
| Adult patients                                          | No. of sample | 19            | 23      | 13        | 4       | 0     | 1     | 0       | Adult patients                                          | No. of sample | 19      | 23      | 13      | 4       | 0     | 1     | 0       |
|                                                         | n             | 7             | 8       | 4         | 1       | 0     | 1     | 0       |                                                         | n             | 7       | 8       | 4       | 1       | 0     | 1     | 0       |
| Mild disease                                            | Median ± IQR  | 0.2±0.3       | 2.2±4.9 | 2.9±7.3   | 8.2     | -     | 2.4   | -       | Mild disease                                            | Median ± IQR  | 0.1±0.0 | 0.3±0.7 | 1.5±1.8 | 10.8    | -     | 1.1   | -       |
|                                                         | %             | 14            | 63      | 75        | 100     | -     | 100   | -       |                                                         | %             | 0       | 13      | 75      | 100     | -     | 0     | -       |
|                                                         | n             | 10            | 9       | 4         | 3       | -     | -     | -       |                                                         | n             | 10      | 9       | 4       | 3       | -     | -     | -       |
| Moderate disease                                        | Median ± IQR  | 0.2±0.3       | 0.3±3.0 | 2.9±4.2   | 9.5±4.3 | -     | -     | -       | Moderate disease                                        | Median ± IQR  | 0.1±0.0 | 0.1±1.7 | 0.2±1.0 | 5.2±6.3 | -     | -     | -       |
|                                                         | %             | 0             | 22      | 75        | 100     | -     | -     | -       |                                                         | %             | 0       | 22      | 25      | 100     | -     | -     | -       |
|                                                         | n             | 2             | 6       | 5         | -       | -     | -     | -       |                                                         | n             | 2       | 6       | 5       | -       | -     | -     | -       |
| Severe & critically ill                                 | Median ± IQR  | 0.2±0.1       | 0.2±0.2 | 14.9±13.4 | -       | -     | -     | -       | Severe & critically ill                                 | Median ± IQR  | 0.1±0.0 | 0.1±0.0 | 7.3±9.9 | -       | -     | -     | -       |
|                                                         | %             | 0             | 0       | 80        | -       | -     | -     | -       |                                                         | %             | 0       | 0       | 60      | -       | -     | -     | -       |
| Dunn's multiple comparisons test                        | p-values      |               |         |           |         |       |       |         | Dunn's multiple comparisons test                        | p-values      |         |         |         |         |       |       |         |
| Adult patients: mild disease vs moderate disease        | ns            | 0.2657        | ns      | -         | -       | -     | -     |         | Adult patients: mild disease vs moderate disease        | 0.3689        | 0.6938  | 0.4390  | -       | -       | -     | -     |         |
| Adult patients: mild disease vs severe & critically ill | ns            | <b>0.0476</b> | 0.7271  | -         | -       | -     | -     |         | Adult patients: mild disease vs severe & critically ill | 0.9629        | ns      | ns      | -       | -       | -     | -     |         |
| Adult patients: mild disease vs severe & critically ill | ns            | ns            | 0.8495  | -         | -       | -     | -     |         | Adult patients: mild disease vs severe & critically ill | ns            | ns      | 0.1334  | -       | -       | -     | -     |         |
| Fisher's Exact test between groups                      | p-values      |               |         |           |         |       |       |         | Fisher's Exact test between groups                      | p-values      |         |         |         |         |       |       |         |
| Adult patients: mild disease vs moderate disease        | 0.4118        | 0.1534        | ns      | ns        | -       | -     | -     |         | Adult patients: mild disease vs moderate disease        | ns            | ns      | 0.4857  | ns      | -       | -     | -     |         |
| Adult patients: mild disease vs severe & critically ill | ns            | <b>0.0310</b> | ns      | -         | -       | -     | -     |         | Adult patients: mild disease vs severe & critically ill | ns            | ns      | ns      | -       | -       | -     | -     |         |
| Adult patients: mild disease vs severe & critically ill | ns            | 0.4857        | ns      | -         | -       | -     | -     |         | Adult patients: mild disease vs severe & critically ill | ns            | ns      | 0.5238  | -       | -       | -     | -     |         |

**Table S2. Comparisons of the SARS-CoV-2 S1-specific antibody levels between adult patients of different disease severity.** The antibody levels in S/C ratios at the same time point were compared by the Kruskal-Wallis test followed by Dunn's multiple comparison, while the percentages of positive samples were compared by Fisher's Exact test. P values smaller than 0.05 are bolded, p values >0.9999 are represented by ns (not significant) while dashes mean no data for compa

|                                                               | Paediatrics | Adult all  | Adult 1    | Adult 2    | Adult 3+4  |
|---------------------------------------------------------------|-------------|------------|------------|------------|------------|
|                                                               | n = 20      | n = 43     | n = 17     | n = 15     | n = 11     |
| Day between symptom onset and diagnosis<br>(median $\pm$ IQR) | 0 $\pm$ 1   | -1 $\pm$ 3 | -1 $\pm$ 2 | -2 $\pm$ 2 | -2 $\pm$ 3 |

**Table S3:** The median and interquartile range of the period between onset of symptoms and day of diagnosis.

Negative median means the symptoms had started before the PCR positive laboratory-based diagnosis.

| Days post diagnosis | Paediatric patients |                  |             |                  | Adult patients |                  |                  |                  |                       |                  |
|---------------------|---------------------|------------------|-------------|------------------|----------------|------------------|------------------|------------------|-----------------------|------------------|
|                     | Asymptomatic        |                  | Symptomatic |                  | Mild disease   |                  | Moderate disease |                  | Severe/critically ill |                  |
|                     | n                   | Median $\pm$ IQR | n           | Median $\pm$ IQR | n              | Median $\pm$ IQR | n                | Median $\pm$ IQR | n                     | Median $\pm$ IQR |
| 0                   | 8                   | 34.0 $\pm$ 6.2   | 11          | 18.3 $\pm$ 5.6   | 4              | 17.7 $\pm$ 4.1   | 5                | 18.7 $\pm$ 14.5  | 3                     | 21.7 $\pm$ 9.0   |
| 1                   | 7                   | 34.0 $\pm$ 5.1   | 8           | 21.5 $\pm$ 14.6  | 5              | 22.6 $\pm$ 10.2  | 4                | 22.4 $\pm$ 10.4  | 1                     | 20.2 $\pm$ 0     |
| 2                   | 0                   | -                | 5           | 20.7 $\pm$ 4.5   | 6              | 17.8 $\pm$ 8.9   | 1                | 24.1 $\pm$ 0     | 2                     | 23.6 $\pm$ 16.4  |
| 3                   | 9                   | 31.4 $\pm$ 10.6  | 3           | 33.2 $\pm$ 6.4   | 3              | 27.9 $\pm$ 10.7  | 9                | 18.2 $\pm$ 9.0   | 2                     | 22.3 $\pm$ 5.2   |
| 4                   | 5                   | 35.0 $\pm$ 6.1   | 3           | 31.1 $\pm$ 18.1  | 3              | 23.8 $\pm$ 11.1  | 5                | 22.1 $\pm$ 8.9   | 2                     | 24.3 $\pm$ 15.5  |
| 5                   | 9                   | 35.0 $\pm$ 7.1   | 10          | 30.5 $\pm$ 7.4   | 3              | 27.2 $\pm$ 11.7  | 6                | 23.2 $\pm$ 12.7  | 3                     | 35.0 $\pm$ 15.8  |
| 6                   | 5                   | 35.4 $\pm$ 10.0  | 6           | 31.1 $\pm$ 8.0   | 4              | 29.3 $\pm$ 6.8   | 4                | 26.1 $\pm$ 9.5   | 6                     | 21.4 $\pm$ 8.5   |
| 7                   | 3                   | 40.0 $\pm$ 7.1   | 9           | 32.7 $\pm$ 11.2  | 7              | 27.0 $\pm$ 18.4  | 1                | 23.0 $\pm$ 0     | 2                     | 18.7 $\pm$ 1.6   |
| 8                   | 2                   | 33.8 $\pm$ 12.3  | 8           | 37.5 $\pm$ 9.4   | 7              | 35.0 $\pm$ 16.3  | 8                | 28.3 $\pm$ 11.2  | 6                     | 26.3 $\pm$ 7.7   |
| 9                   | 4                   | 40 $\pm$ 0       | 9           | 35.0 $\pm$ 9.4   | 4              | 30.4 $\pm$ 17.4  | 4                | 35.0 $\pm$ 1.4   | 1                     | 24.4 $\pm$ 0     |
| 10                  | 4                   | 40 $\pm$ 3.8     | 6           | 30.0 $\pm$ 6.2   | 2              | 37.5 $\pm$ 5.0   | 4                | 33.9 $\pm$ 8.3   | 3                     | 30.0 $\pm$ 9.8   |
| 11                  | 1                   | 35.0 $\pm$ 0     | 4           | 35.0 $\pm$ 5.2   | 5              | 31.4 $\pm$ 8.6   | 3                | 32.6 $\pm$ 6.1   | 3                     | 30.6 $\pm$ 9.5   |
| 12                  | 2                   | 35.0 $\pm$ 10.1  | 7           | 31.8 $\pm$ 5.1   | 1              | 40 $\pm$ 0       | 3                | 30.9 $\pm$ 9.3   | 2                     | 26.9 $\pm$ 3.5   |
| 13                  | 1                   | 40 $\pm$ 0       | 2           | 35.0 $\pm$ 0     | 3              | 35.0 $\pm$ 18.3  | 5                | 35.0 $\pm$ 11.3  | 3                     | 23.7 $\pm$ 12.4  |
| 14                  | -                   | -                | 5           | 35.0 $\pm$ 3.1   | 4              | 34.2 $\pm$ 6.0   | 4                | 34.8 $\pm$ 10.1  | 1                     | 40 $\pm$ 0       |
| 15                  | 2                   | 37.5 $\pm$ 5.0   | 4           | 37.5 $\pm$ 5.0   | 3              | 34.2 $\pm$ 17.0  | 2                | 37.3 $\pm$ 5.4   | 4                     | 29.4 $\pm$ 6.4   |
| 16                  | 1                   | 35 $\pm$ 0       | 6           | 35.0 $\pm$ 5.6   | 1              | 35.0 $\pm$ 0     | 3                | 25.6 $\pm$ 2.5   | 2                     | 25.8 $\pm$ 4.3   |
| 17                  | -                   | -                | 2           | 36.3 $\pm$ 7.4   | 1              | 31.1 $\pm$ 0     | -                | -                | 1                     | 22.9 $\pm$ 0     |
| 18                  | -                   | -                | 2           | 30.1 $\pm$ 6.4   | -              | -                | 2                | 36.1 $\pm$ 7.8   | 3                     | 29.7 $\pm$ 1.5   |
| 19                  | -                   | -                | 1           | 40 $\pm$ 0       | 1              | 37.6 $\pm$ 0     | 1                | 40 $\pm$ 0       | 3                     | 27.5 $\pm$ 7.0   |
| 20                  | -                   | -                | -           | -                | 1              | 33.7 $\pm$ 0     | 1                | 27.9 $\pm$ 0     | 2                     | 31.4 $\pm$ 3.6   |
| 21                  | -                   | -                | -           | -                | -              | -                | 0                | -                | 3                     | 30.9 $\pm$ 14.8  |
| 22                  | -                   | -                | -           | -                | -              | -                | 0                | -                | 2                     | 36.2 $\pm$ 7.7   |
| 23                  | -                   | -                | -           | -                | -              | -                | 1                | 27.4 $\pm$ 0     | 1                     | 27.9 $\pm$ 0     |
| 24                  | -                   | -                | -           | -                | -              | -                | 0                | -                | 1                     | 29.2 $\pm$ 0     |
| 25                  | -                   | -                | -           | -                | -              | -                | 1                | 40 $\pm$ 0       | 1                     | 29.5 $\pm$ 0     |
| 26                  | -                   | -                | -           | -                | -              | -                | 1                | 35.0 $\pm$ 0     | 1                     | 30.0 $\pm$ 0     |

**Table S4:** The number of specimen (n) and the median and interquartile range (IQR) of the CT values of the corresponding patient group on each day.

| Patients | Comorbidities                                                                                                                                                |
|----------|--------------------------------------------------------------------------------------------------------------------------------------------------------------|
| 1        | Hypertension (HT), Hx of cerebrovascular accident, Bipolar Affective Disorder, Alcoholism                                                                    |
| 2        | Diabetes mellitus (DM), HT, Obese, Gout (Year 2010), Microalbuminuria, known obstructive sleep apnea (OSA) not on continuous positive airway pressure (CPAP) |
| 3        | Benign prostatic hyperplasia (BPH)                                                                                                                           |
| 4        | Hyperlipidaemia and Hypothyroidism                                                                                                                           |
| 5        | Atrial fibrillation with long pause                                                                                                                          |
| 6        | Non-ulcer dyspepsia, Helicobacter pylori eradication, Renal stone extracorporeal shock wave lithotripsy (ESWL) & surgery                                     |
| 7        | DM, ruptured anterior communicating artery (ACoA) aneurysm with craniotomy and clipping done, pneumococcal meningitis in year 2015                           |

**Table S5:** The comorbidities of the seven adult patients with severe COVID-19.
